# Supplementary material for: Evaluating InSAR-derived rates of surface-elevation change along the central U.S. Gulf Coast
Source: Copernicus journal article supplement (doi:10.5194/egusphere-2026-824), 2026-02-17
Supplement: Supplementary file [file egusphere-2026-824-AC2-supplement.pdf]

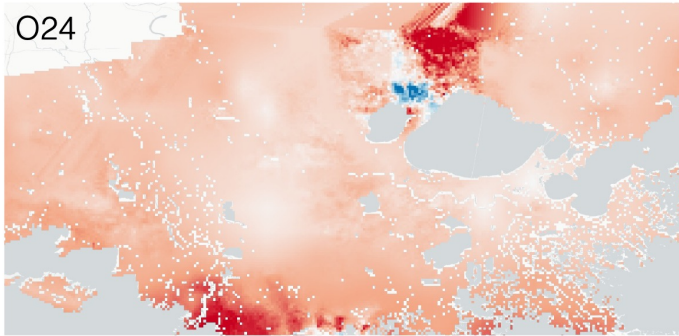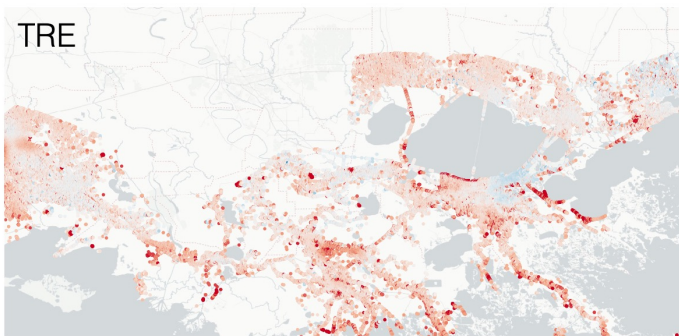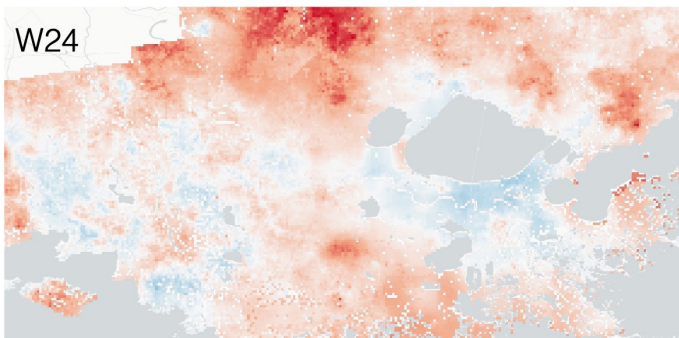

Surface-elevation  
change rate

10 mm/yr

-10 mm/yr
